# Supplementary material
Source: MDPI journal article supplement (https://www.mdpi.com/2072-4292/14/12/2819)
Supplement: s1 [file s1]

**Table S1** Descriptive Statistics for Training Data Parameters

| Variable                   | Nov-17 |       |       |          | Jan-18 |       |       |          |
|----------------------------|--------|-------|-------|----------|--------|-------|-------|----------|
|                            | Min    | Max   | Mean  | St. Dev. | Min    | Max   | Mean  | St. Dev. |
| Bare Soil Fractions        | 0      | 0.996 | 0.143 | 0.271    | 0      | 0.999 | 0.206 | 0.355    |
| Green Vegetation Fractions | 0      | 0.998 | 0.305 | 0.369    | 0      | 0.98  | 0.243 | 0.362    |
| Senesced Fractions         | 0      | 0.993 | 0.132 | 0.293    | 0      | 0.998 | 0.148 | 0.318    |
| Subtidal/Water Fractions   | 0      | 1     | 0.191 | 0.332    | 0      | 0.998 | 0.199 | 0.33     |
| Shade Fractions            | 0      | 0.759 | 0.189 | 0.153    | 0      | 0.539 | 0.195 | 0.147    |
| NDVI                       | -0.302 | 0.596 | 0.308 | 0.176    | -0.114 | 0.525 | 0.254 | 0.127    |
| mARI                       | 0      | 0.003 | 0.001 | 0.0003   | 0.095  | 1.835 | 0.768 | 0.364    |
| DTM                        |        |       |       |          | 1.16   | 3.515 | 1.654 | 0.414    |

**Table S1** (cont.)

| Variable                   | Nov-18 |       |       |          | Nov-20 |       |       |          |
|----------------------------|--------|-------|-------|----------|--------|-------|-------|----------|
|                            | Min    | Max   | Mean  | St. Dev. | Min    | Max   | Mean  | St. Dev. |
| Bare Soil Fractions        | 0      | 0.995 | 0.125 | 0.258    | 0      | 0.997 | 0.125 | 0.259    |
| Green Vegetation Fractions | 0      | 0.999 | 0.352 | 0.388    | 0      | 0.999 | 0.274 | 0.379    |
| Senesced Fractions         | 0      | 0.999 | 0.2   | 0.294    | 0      | 0.999 | 0.167 | 0.304    |
| Subtidal/Water Fractions   | 0      | 0.981 | 0.102 | 0.244    | 0      | 0.998 | 0.1   | 0.256    |
| Shade Fractions            | 0      | 0.729 | 0.201 | 0.191    | 0      | 0.795 | 0.181 | 0.195    |
| NDVI                       | -0.394 | 0.669 | 0.345 | 0.173    | -0.43  | 0.632 | 0.332 | 0.204    |
| mARI                       | 0.0004 | 0.002 | 0.001 | 0.0003   | -0.142 | 2.51  | 1.031 | 0.643    |
| DTM                        |        |       |       |          |        |       |       |          |
